# Supplementary material
Source: PubMed Central journal article supplement (PMC4611656)
Supplement: pnas.201513127SI.pdf [file pnas.201513127SI.pdf]

# Supporting Information

Reed et al. 10.1073/pnas.1513127112

## Full Results of PCA

The PCA analyzing the types of TCs that explain the greatest variance in storm surge heights was performed in Matlab by first creating an array of the variables we were interested in (RMW, storm pressure, and maximum winds at landfall) for

each model, and then using the built-in function “princomp” with this array. In this way, we were able to perform the PCA for each model. The full results from our PCA, including the percent variance explained by each component, are included in Table S1.

**Table S1. Full results of principle component analysis**

| Model | Characteristic     | Component 1 | Component 2 | Component 3 |
|-------|--------------------|-------------|-------------|-------------|
| MPI   | RMW                | 0.8025      | 0.5966      | 0.0074      |
|       | minimum pressure   | 0.2118      | -0.2964     | 0.0313      |
|       | maximum wind       | -0.5577     | 0.7458      | 0.3643      |
|       | explained variance | 80.69%      | 16.91%      | 2.4%        |
| CCSM4 | RMW                | 0.8175      | 0.5720      | 0.0672      |
|       | minimum pressure   | 0.1537      | -0.3292     | 0.9317      |
|       | maximum wind       | -0.5550     | 0.7513      | 0.3570      |
|       | explained variance | 87.71%      | 10.60%      | 1.69%       |
| IPSL  | RMW                | 0.7622      | 0.6331      | 0.1349      |
|       | minimum pressure   | 0.1972      | -0.4256     | 0.8831      |
|       | maximum wind       | -0.6165     | 0.6465      | 0.4493      |
|       | explained variance | 86.23%      | 12.12%      | 1.65%       |
